# Supplementary material for: Control of inflorescence architecture in tomato by BTB/POZ transcriptional regulators
Source: PubMed Central journal article supplement — Genes Dev. 2016 Sep 15;30(18):2048–61. doi: 10.1101/gad.288415.116 (PMC5066612; doi:10.1101/gad.288415.116), 2016-09-15
Supplement: supp_30.18.2048_Supplemental_Data.pdf [file supp_30.18.2048_Supplemental_Data.pdf]

## SUPPLEMENTAL MATERIAL

### Control of inflorescence architecture in tomato by BTB/POZ transcriptional regulators

Cao Xu, Soon Ju Park, Joyce Van Eck, Zachary B. Lippman

#### I. Supplemental Figures

**Supplemental Figure S1.** *E.coli*. recombinantly expressed proteins and Western blots for GST-pull down assay. ....pg.2

**Supplemental Figure S2.** Alignment of SIBOP1/2/3 with NPR1 and BOP1/2 proteins from *Arabidopsis* (AtBOP1/2).....pg.3

**Supplemental Figure S3.** Pleiotropic vegetative and reproductive phenotypes of *CR-slbop* single and higher-order mutant plant.....pg.5

**Supplemental Figure S4.** Alignment of *SIBOP1*, 2, 3 coding sequences used for generating the hairpin RNAi construct to knockdown *SIBOP1*, 2 and 3 transcript levels in *RNAi-slbop* plants.....pg.7

**Supplemental Figure S5.** Molecular and phenotypic analysis of *RNAi-slbop* plants.....pg.8

**Supplemental Figure S6.** Inflorescence phenotypes of *RNAi-slbop an* and *RNAi-slbop fa* mutant plants.....pg.9

**Supplemental Figure S7.** *RNAi-slbop* enhances a weak allele of *tmf*.....pg.10

**Supplemental Figure S8.** CRISPR/Cas9-generated null mutations in *TFAM1* and 2 result in phenotypes that match multiple defects of *slbop* single mutants.....pg.11

**Supplemental Figure S9.** Driving expression of the flower specification gene *AN* in the earliest stage of meristem maturation using *TMF* promoter (Transactivation, LhG4, OP system) results in single-flower primary inflorescence after producing only two leaves.....pg.13

#### II. Supplemental Tables

**Supplemental Table S1.** Single guide RNA (sgRNA) sequences and genotyping primers of *CR-slbops* and *CR-tfams*.....pg.14

**Supplemental Table S2.** qRT-PCR primers used in this study.....pg.15

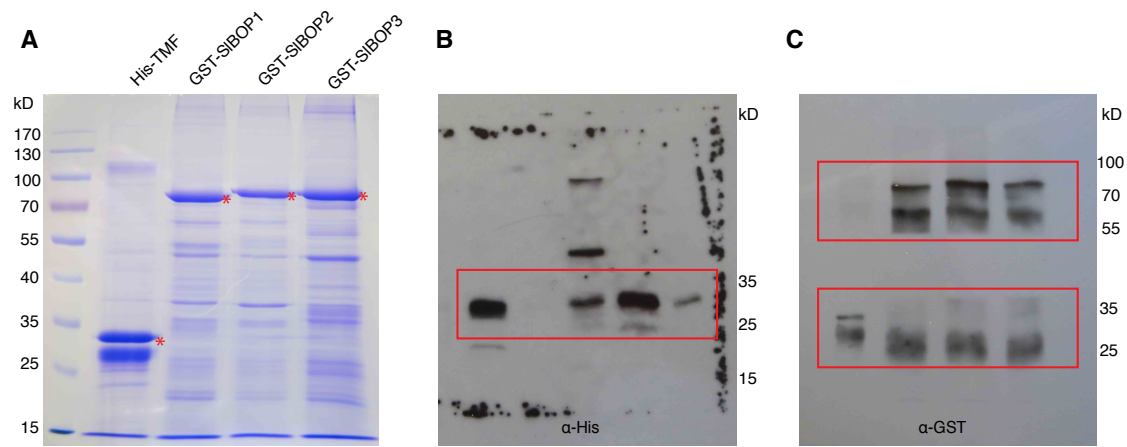

**Supplemental Figure S1.** *E.coli*. recombinantly expressed proteins and Western blots for GST-pull down assay. (A) Coomassie gel showing purified recombinant expressed His-TMF and GST-SIBOP1/2/3 proteins. (B, C) Un-cropped Western blotting images for pull down assay. Red stars note recombinant expressed proteins, Red rectangles indicate the cropped portions for preparing Fig. 1D.

```

NPR1      MDTTIDGFADSYEISSTSFVATDNTDSSIVYLAEEQVLTPGDVSAQLQLLSNSFESVFDSP
AtBOP1    MSNTF-----EESLKSMSLDVNLNLLING-----
AtBOP2    -MSNL-----EESLRSLSLDVNLNLLING-----
SlBOP1    MSNNP-----EDPLRSLSDVNLNLLING-----
SlBOP2    -MNTL-----EDSLKTLSDVNLNLLING-----
SlBOP3    -MNTL-----EDSLKTLSDVNLNLLING-----
          ..                               *: *   .: .*: * * .

          BTB/POZ

NPR1      DDFYSDAKLVLDGREVSHRCVLSARSFFKSAALAAAK-----EKDSNNTA----
AtBOP1    -QAFSDVTFV-EGRLVHAHRCILAARSLFRKFFCESDPSQ---P--GAEPANQT-GSG
AtBOP2    -QAFSDVTFV-EGRLVHAHRCILAARSLFRKFFCGTDPQ---PVTGIDPTQHG-SVP
SlBOP1    -QAFSDVTFV-EGRLVHAHRCVLAARSOFRKFFCGPSS---P--QSGP-QLG-SVN
SlBOP2    -QAFSDVTFV-EGRLVHAHRCILAARSLFRKFFCGPES---P--GGGP-DPSVGGF
SlBOP3    -QAFSDVTFV-EGRLVHAHRCILAARSLFRKFFCGPESASVSGP--RLGPFVGGAGLA
          : * * . : : * . : * * * : * * * . * . . . .

NPR1      ---AVKLELKEIAKDYEVGFDVVTVLAYVYSSRVPPPKGV--SECADENCCHVACR
AtBOP1    AR---AAVGGVIVPNSVGVYEVFLLLQLYLSGQVSIYPKHHEPRSNCGDRGCWHTHCT
AtBOP2    ASPTRGSTAPAGIIPVNSVGVYEVFLLLQLYLSGQVSIYPQKHEPRPNCGERGCWHTHCS
SlBOP1    GPRDGTSPASSVIVPNSVGVYEVFLMMQLYLSGQVSIYPQKHEPRPNCGERGCWHTHCT
SlBOP2    SPRTSTSSQVIVPNSVGVYEVFLMLQLYLSGQVSIYPQKHEPRPNCGERNCWHTHCT
SlBOP3    SSPRGTTSCSQVIVPNTVGVYEVFLMLQLYLSGQVSIYPQKHEPRPNCGERNCWHTHCT
          : * * : : : * * * : * * * . * . . . .

NPR1      PAVDFMLEVLYLAFIFKIPELITLYQRHLDDVVKVIEDTLVILKLANICGKACMKLLD
AtBOP1    AAVDLSDILDAAARYFGVEQLALLTQKHLTSMVEKASIEDVMKVLIASR--KQDMHQLWT
AtBOP2    AAVDLALDTLAARSYFGVEQLALLTQKQLASMEKASIEDVMKVLIASR--KQDMHQLWT
SlBOP1    SAVDLALDTLAARSFGVEQLALLTQKQLAMVEKASIEDVMRVLIASR--KQDMQLWT
SlBOP2    SAVDLALDTLAARSFGVEQLALLTQKQLTSMVEKTSIEDVMKVLIASR--KQDMPLWT
SlBOP3    SAVDLALDTLAARSFGVEQLALLTQKHLISMVEKASIEDVMKVLIASR--KQDMHQLWT
          . * * * : * * : * : * * * * : * * * : * * * . * . . . : * * .

NPR1      RCKEIIVKSNVDMVSLKSLPEELVKEIID-----RRKELGLEV
AtBOP1    TCSYLIKASGLPQEIILAKHLPIDVVKIIEELRLKSSMPLRSLMP-----HHDLTSTL
AtBOP2    TCSHLVAKSGLPPEILAKHLPIDVVKIIEELRLKSSIARRSLMPPH-----HHDLVSAQ
SlBOP1    TCSHLVAKSGLPPEILAKHLPIDVVKIIEELRLKSNLARRSLMPPHH-----HHDLSSSA
SlBOP2    TCSHLVAKSGLPPEILAKHLPIDVVKIIEERLKTSLARRSLISH-----HQHDLSSST
SlBOP3    TCSHLVAKSGLPPEILAKHLPIDVVKIIEELRLKSSIARRSLIPHHHHHQHQHMSNI
          * . : . * * : * * * * : * * * : * * * . . . .
          Ankyrin repeat

NPR1      PKVKHVSNVHKAALDSDIELVKLLKEDHTNLDACALHFVAVYCNVKTATDLLKDLDA
AtBOP1    DLEDQKIRRMRRALDSDVLEVKLMVMGEGLNLDSESLALHYAVENCSREVVKALLELGA
AtBOP2    DLEDQKIRRMRRALDSDVLEVKLMVMGEGLNLDSESLALHYAVENCSREVVKALLELGA
SlBOP1    ELEDQKIRRMRRALDSDVLEVKLMVMGEGLNLDSEIALHYAVENCSREVVKALLELGA
SlBOP2    ELEDQKIRRMRRALDSDVLEVKLMVMGEGLNLDSEIALHYAVENCSREVVKALLELGA
SlBOP3    ELEDQKIRRMRRALDSDVLEVKLMVMGEGLNLDSESLALHYAVENCSREVVKALLELGA
          . : : . . * * * * : * * * * : * * * * : * * * * : * * * * . * . . . * *

NPR1      DVNHRN-PRGYTVLHVAAMRKEPQILSLEKASASEATLEGRTALMIAKQATMAVECN
AtBOP1    DVNYPAGPTGKTALHIAAEMVSPDMVAVLLDHDHPNVQTVGDIPLDLRLTLT-----
AtBOP2    DVNYPAGPKGTPPLHIAAEMVSPDMVAVLLDHDHPNVRTVGGITPLDLRLTLT-----
SlBOP1    DVNFPAGPKGTPPLHIAAEMVSPDMVAVLLDHDHPNVRMLDGIPLDLRLTLT-----
SlBOP2    DVNHPAGPKGTPPLHIAAEMVSPDMVAVLLDHDHPNVRTMDGITPLDLRLTLT-----
SlBOP3    DVNYQAGPCKSPLHIAAEMVSPDMVAVLLDHDHPNQTVDGITPLDLRLTLT-----
          : * * . * * : * * * : * * * : * * * . . . . : * * * * . *

NPR1      NIPEQCKHSLKGRLCVEILEQEDKREQIPRDVPPSFAVADELKMTLLDLENRVALAQR
AtBOP1    ---SDFLFGK-----AIPGLTHIEPNKLRCL-----
AtBOP2    ---SDFLFGK-----AIPGLTHIEPNKLRCL-----
SlBOP1    ---SDFLFGK-----AIPGLTHIEPNKLRCL-----
SlBOP2    ---SDFLFGK-----AIPGLTHIEPNKLRCL-----
SlBOP3    ---SDFLFGK-----AIPGLTHIEPNKLRCL-----
          . . . : * * * * : * * * : * * * : * * * .

NPR1      FPTEAQAAMEIAEMKGTCEFIVTSLDPRLTGTKRTPGKVIAPPRILEEHQSRKALKS
AtBOP1    -----ELVQSAALVISREEGN---SNDNNTMIYPRM--KDEHTS-----
AtBOP2    -----ELVQSAAMVISREEGNNSNQNNDNTGIYPHM--NEEHNS-----
SlBOP1    -----ELVQSAAMVISREEGSAN---IDLSSTNIYFPNNMSDDHTS-----
SlBOP2    -----ELVQSAAMVISREETTN---NVPSSTAIYQPIN--NEDHGS-----
SlBOP3    -----ELVQSAAMVISREEGEAN---NNQSSENMYTHI--REDHSS-----
          * : . . : : * * * * : * * * : * * * .

NPR1      TVELGKRFFPRCSAVLDQIMNCEDLTQLACGEDDTAEKRLQKQRYMEIQETLKKAFSED
AtBOP1    -----GSSLDRLV-----YLNLGATNR-----
AtBOP2    -----GSS-----GSSNNLDSRLV-----YNLNGACTGMGPGR-----
SlBOP1    -----STST-----SGTN--NIDSRMV-----YNLGGGVV-----
SlBOP2    -----STNTTVGGNNLDSRMV-----YNLGAGTSIAQQIG-----
SlBOP3    -----STSS-----GNNLDSRMV-----YNLNGANVANHHHQ
          . . . : * * * * : * * * : * * * .

NPR1      NLELGNSSLDSTSTSKSTGGKRSNRKLSHRRR---
AtBOP1    DIGDDNSQREGMNLHHHH---DPSTMYHHHH--HF
AtBOP2    DQGDHNSQREGMSRHHHHQ---DPSTMYHHHHQHF
SlBOP1    ---NTSSTHD-----HPSSMYHSSH--EY
SlBOP2    CNRMTNQDDHNSHNKQRHGEFDPSSMYRPS---
SlBOP3    ACKMNNNDHDCSSSHNQ---NPSTMYHHHHSQY
          . . : . .

```

**Supplemental Figure S2.** Alignment of SIBOP1/2/3 with NPR1 and BOP1/2 proteins from *Arabidopsis* (AtBOP1/2). Single and double lines indicate the BTB/POZ and ankyrin repeat domains, respectively. Blue color highlights the two essential domains and two oxidized cysteine residues in NPR1 that are required for its SA-induced transcriptional regulation, which are absent in SIBOP proteins. Green color and arrow noted the cysteine residue in NPR1 that is critical for its S-nitrosylation and SA-induced oligomerization. Red color highlighted the four conserved cysteine residues in the BTB/POZ domain that are shared among all six BTB/POZ proteins and are important for oligomerization of NPR1. The highly conserved domain marked by the four cysteine residues is labeled by red rectangles.

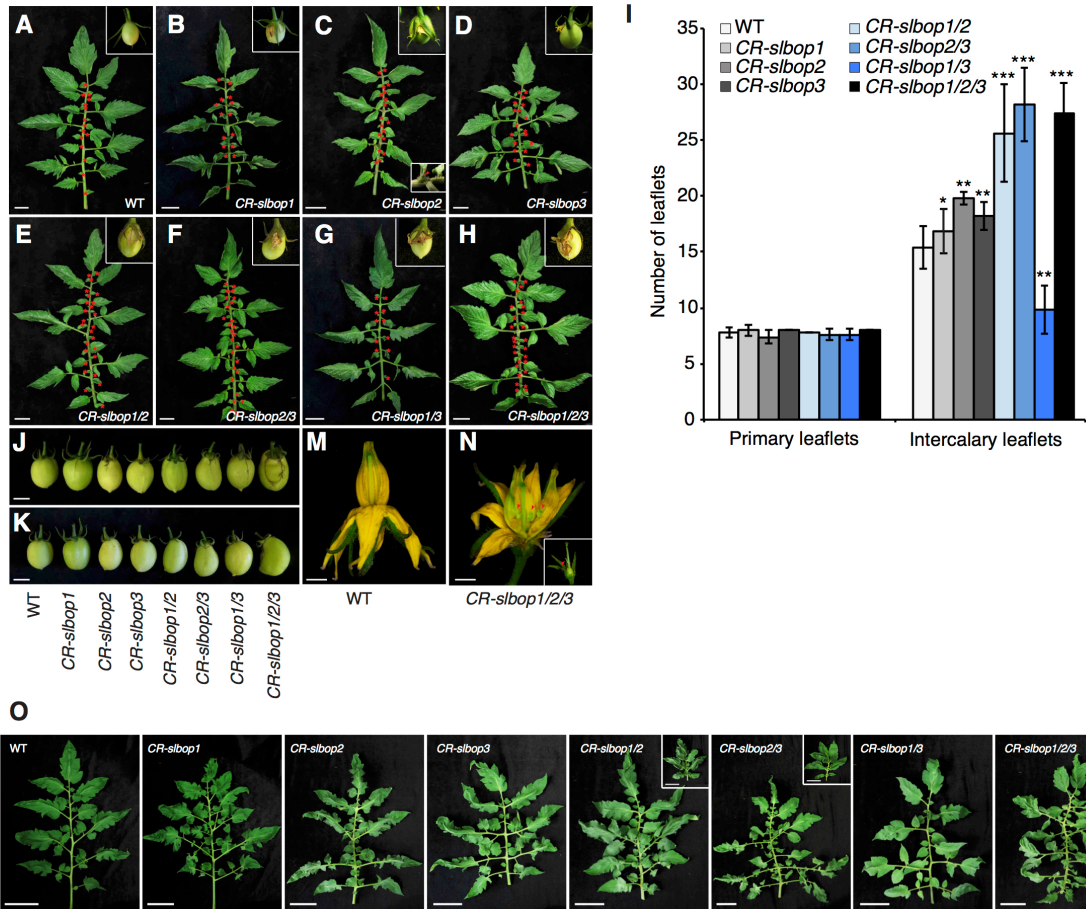

**Supplemental Figure S3.** Pleiotropic vegetative and reproductive phenotypes of *CR-slbop* single and higher-order mutant plants. (A-H) Representative mature leaf from WT (A), single mutants of *CR-slbop1* (B), *CR-slbop2* (C), *CR-slbop3* (D), double mutants of *CR-slbop1/2* (E), *CR-slbop2/3* (F), *CR-slbop1/3* (G), and *CR-slbop1/2/3* triple mutants (H) showing altered leaf complexity and floral organ abscission defects (insets). Inset in (C) shows ectopic shoot generation on the rachis of a *CR-slbop2* leaf. Red asterisks indicate intercalary leaflets and floral abscission defects, respectively. (I) Quantification and statistical comparison of leaflets in WT and *CR-slbop* mutants. (J, K) Representative fruits from WT and *CR-slbop* mutants showing scars on fruits (J) and fruit shape phenotypes (K) in *CR-slbop* mutants. (M, N) Representative flowers from WT (M) and

*CR-slbop1/2/3* triple mutants (*N*) showing ectopic twisted stigmas fused with stamens in *CR-slbop1/2/3* triple mutants. Inset shows ectopic stigma fused to the carpels of an ovary, explaining the origin of fruit scarring. (*O*) Representative leaves from single and higher order *CR-slbop* mutants grown under greenhouse conditions, where leaf phenotypes were often enhanced. For example, *CR-slbop1* leaves appeared larger than WT, primarily due to longer petiolules, and *CR-slbop2* leaves developed more intercalary leaflets that were frequently fused along the rachis. Insets show rare examples of more extreme leaves. Data are means ( $\pm$ s.d.);  $n = 5$ . A two-tailed, two-sample Student's *t* test was performed, and significant differences are represented by black asterisks: \* $P < 0.05$ , \*\* $P < 0.01$ , \*\*\* $P < 0.001$ . Scale bars, 2 cm (*A-K*), 500  $\mu$ m (*M, N*), 5 cm (*O*).

```

SlBOP1      ATGAGTAATAATCCTGAAGATCCCTTAAGAAGTCTCTCTTTAGATTATCTCAATCTCCTC
SlBOP2      ---ATGAATACCTTTGAAGATTCCCTTAAAACTCTCTCTTTAGATTATCTAAATCTTCTC
SlBOP3      ---ATGAATACCTTTGAAGATTCCCTTAAAACTCTCTCTTTAGATTATCTAAATCTTCTC
          *   **** *   *****   ***** *   *****   *****   *****
SlBOP1      ATCAATGGTCAAGCTTTCAGTGATGTTACTTTTCATGTTGAAGGTCATTTAGTCCATGCT
SlBOP2      ATCAATGGTCAAGCTTTCAGTGATGTTACTTTTCAGTGTTGAAGGTCGTTAATACATGCT
SlBOP3      ATCAACGGTCAAGCTTTCAGTGATGTTACTTTTCAGTGTTGAAGGTCGTTAATACATGCT
          *****   *****   *****   *****   *****   *****
SlBOP1      CACCGTTGCGTCTTGGCAGCAAGGAGTCAATTCTTCAGAAAATTTTTCGCGGGCCGAGC
SlBOP2      CATAGATGCATCTTAGCTGCTAGAAGTCTTCTTCCGCAAATCTTTCGCGGGCCGAGC
SlBOP3      CATAGATGCATCTTAGCTGCTAGAAGTCTTGTGTTAGAAAATCTTTCGCGGGCCGAGC
          * * * * * * * * * * * * * * * * * * * * * * * * * * * * * * * *
SlBOP1      TCTCCTCAGTCCGGCCCGCAACTCGGCT-----CGGTTAACGGG
SlBOP2      TCAGCATCTGTCTCCGGCCCGGGTTGGGCCCGTTCGGCGTGGCGTGGATTAGCGTGG
SlBOP3      TCGCCTGGTGGCGGTCCAGAC-----CCTTCGGTGGGCTTTGGAAGC
          * * * * * * * * * * * * * * * * * * * * * * * * * * * * *
SlBOP1      CCGAGAGATACTGGTTCACCAGCATCATCAGTAGTGATACCGGTGAATTCAGTAGGATAT
SlBOP2      TCGCCGAGGGGCACAACAAGTTGTTTCAAGTAGTAATACCTGTGAACATGTAGGGTAT
SlBOP3      CCGCGGACTAGTACTACCAGTAGTTCACAGGTAGTAATACCTGTGAACTCGGTAGGGTAT
          * * * * * * * * * * * * * * * * * * * * * * * * * * * * *
SlBOP1      GAGGTGTTTTTATGATGATGCAGTTTTTATATAGTGGACAAGTATCAATTTGACCGCAA
SlBOP2      GAGGTTTTTTTTGTTGATGTTACAAATTTTGTATAGTGGACAAGTTCATTTGACCGCAA
SlBOP3      GAGGTTTTTTTTGTTGATGTTACAAATTTTGTATAGTGGACAAGTTCATTTGACCGCAA
          *****   *****   ***** * * * * * * * * * * * * * * * *
SlBOP1      AAACATGAGCCAAGGCCAAATTTGTGGAGAGAGAGGTTGTTGGCATAACACATTGCACCTCA
SlBOP2      AAACATGAACCAAGGCCAATTTGTGGTGAAGAAACTGTTGGCATAACACATTGCACATCA
SlBOP3      AAACATGAACCAAGGCCAATTTGTGGTGAAGAAACTGTTGGCATAACACATTGCACATCA
          *****   *****   ***** * * * * * * * * * * * * * * * *
SlBOP1      GCCGTTGATCTTGCACTTGATACACTCTCAGCCGCTAGATCTTTGGTGTGAACAACCTT
SlBOP2      GCCGTTGATCTTGCACTTGATACACTCTCAGCCGCTAGATCTTTGGAGTTGAACAACCTT
SlBOP3      GCCGTTGATCTTGCACTTGATACACTCTCAGCCGCTAGATCTTTGGTGTGAACAACCTT
          *****   *****   *****   *****   *****   *****
SlBOP1      GCTTTGCTCACTCAGAAGCAATTGGCAATCATGGTAGAAAAAGCTTCAATTGAGGATGTG
SlBOP2      GCTTTGCTTACTCAGAAGCATTTGATAAGCATGGTGGAAAAAGCTTCAATTGAGGATGTG
SlBOP3      GCTTTGCTTACTCAGAAGCAATTGACAAGCATGGTAGAAAAACTTCAATTGAGGATGTG
          *****   *****   ***** * * * * * * * * * * * * * * * *
SlBOP1      ATGAGAGTTCTAATAGCATCAAGGAAGCAAGACATGAATCAACTATGGACTACGTGTTCA
SlBOP2      ATGAAAGTTTTAATAGCTTCAAGAAAACAAGACATGCATCAACTTTGGACTACTTGTTCAT
SlBOP3      ATGAAAGTTTTAGTTGCTTCAAGAAAACAAGACATGCCTCAACTTTGGACTACTTGTTCAT
          *****   *****   ***** * * * * * * * * * * * * * * * *
SlBOP1      CATTTGGTTGCAAAATCAGGTCTTCCACCCGAAATGTTGGCCAAACACCTCCCCATTGAT
SlBOP2      CATTTGGTTGCTAAATCAGGTCTCCACCTGAAATCCTAGCCAAACACCTCCCTATTGAT
SlBOP3      CATTTGGTTGCAAAATCAGGCTTCCACCTGAAATCCTAGCAAAACACCTCCCATCGAC
          *****   ***** * * * * * * * * * * * * * * * * * * * *
SlBOP1      GTTGTAGCCAAAATGAGAAGTACGCCTCAAATCCAACCTAGCACGTCGATCCTTAATG
SlBOP2      GTTGTGTCAAAATCGAAGACCTTCGTCTCAAATCCTTATATCGAGAAGATCTTAAATC
SlBOP3      GTTGTGCGAAAATCGAGGAAATTCGCCTAAAACCTTATTAGCGCGAAGATCCTTGATC
          *****   *****   ***** * * * * * * * * * * * * * * * *
SlBOP1      CCACATCATCATCACACCTCGA-----CCTCAGCTCTTCAGCTGAGCTCGAG
SlBOP2      CCTCATCATCATCACACCATCAACATCAACATCAAATGTCTCGAACATTGAGCTCGAG
SlBOP3      TCTCACATCACACGACGAC-----CTAAGTTCGACCTCGGAGCTCGAG
          * * * * * * * * * * * * * * * * * * * * * * * * * * * * *
SlBOP1      GACCAAAAATCCGTAGGATGAGACGAGCCCTTGACTCATCGGACGTTGAACTTGT
SlBOP2      GACCAGAAGATCCGACGAATGAGACGAGCGCTCGATTTCGTCGGACGTTGAACTTAGT
SlBOP3      GACCAAAAATCCGACGAATGAGACGAGCCCTAGACTCATCGGACGTTGAACTTGGT
          *****   *****   ***** * * * * * * * * * * * * * * * *

```

**Supplemental Figure S4.** Alignment of *SlBOP1*, 2, 3 coding sequences used for generating the hairpin RNAi construct to knockdown *SlBOP1*, 2 and 3 transcript levels in *RNAi-slbop* plants. Note the stretches of nucleotide consensus among all three genes, indicated by red stars.

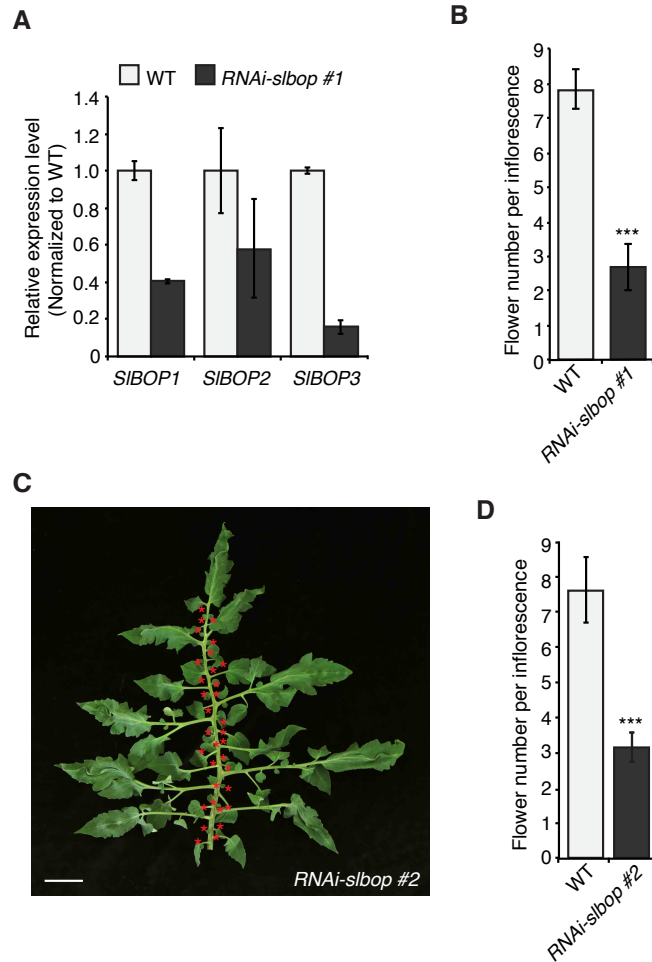

**Supplemental Figure S5.** Molecular and phenotypic analysis of *RNAi-slbop* plants. (A) qRT-PCR showing transcriptional knock-down of *SIBOP1*, 2 and 3 at the TM stage of *RNAi-slbop #1* used for genetic analyses shown in Figure 6. (B) Quantification and comparison of flowers per inflorescence in WT and *RNAi-slbop #1* plants. (C) Representative mature leaf from *RNAi-slbop #2* plants. (D) Quantification of flower number per inflorescence from an additional *RNAi-slbop* transgenic line. Data are means ( $\pm s.d.$ );  $n = 3$  (A), 12 (B, D). A two-tailed, two-sample Student's *t* test was performed, and significant differences are represented by black asterisks: \*\*\* $P < 0.001$ . Scale bar, 5 cm.



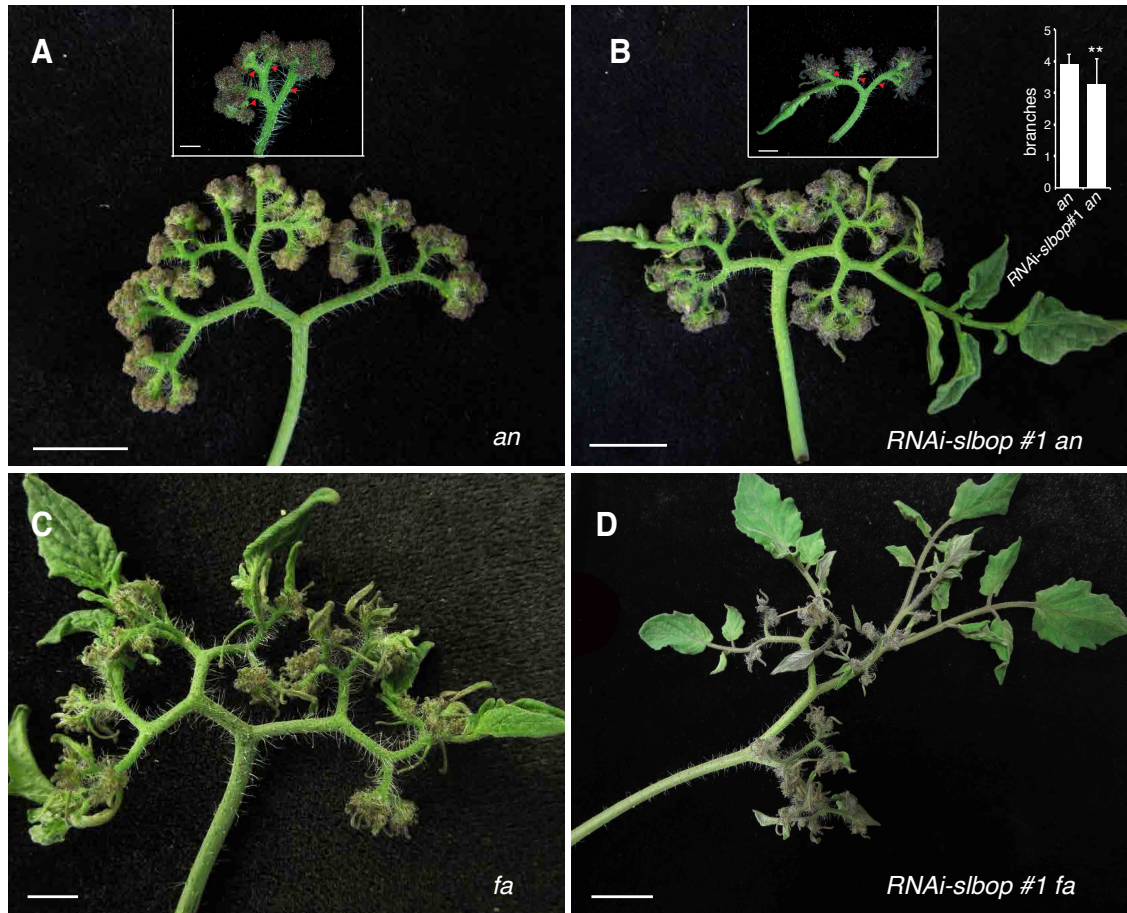

**Supplemental Figure S6.** Inflorescence phenotypes of *RNAi-slbop an* and *RNAi-slbop fa* mutant plants. (A, B) A representative inflorescence for *an* mutant (A) and *RNAi-slbop an* mutant plants (B). *RNAi-slbop an* plants branch less frequently than *an* mutants, as measured by the first branches, and thus SIMs, produced during early inflorescence development (insets and bar graph). (C, D) A highly branched leafy inflorescence from *fa* mutant (C) and *RNAi-slbop fa* mutant plants (D). Data are means ( $\pm$ s.d.);  $n = 21$ . A two-tailed, two-sample Student's  $t$  test was performed, and significant differences are represented by black asterisks:  $**P < 0.01$ . Scale bars, 2 cm.

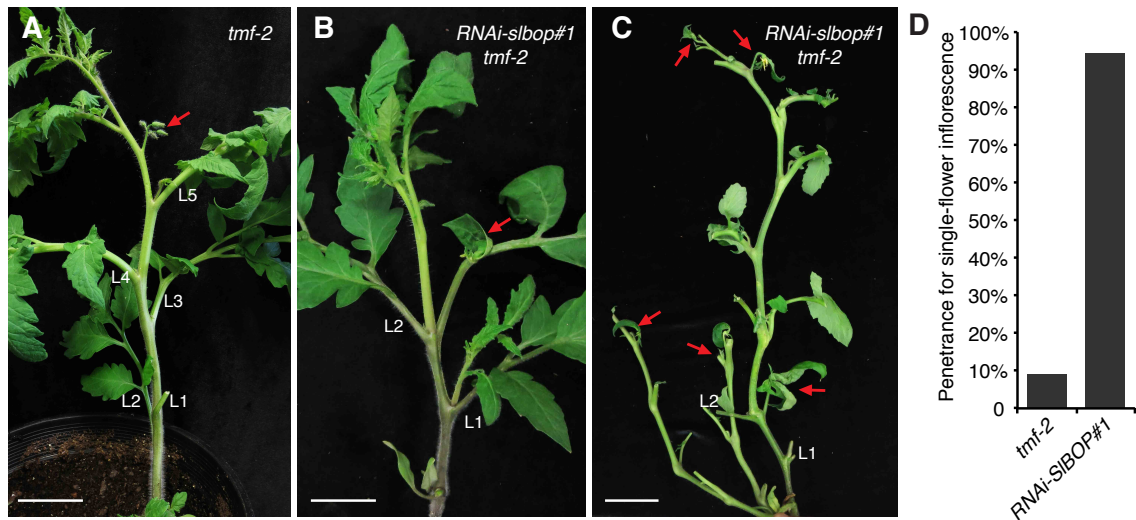

**Supplemental Figure S7.** *RNAi-slbop* enhances a weak allele of *tmf*. (A) Representative primary shoot of the weak *tmf-2* mutation that flowers early, but shows normal multi-flowered primary inflorescences. (B) Introducing *RNAi-slbop* into the *tmf-2* background by crossing results in earlier flowering compared to *tmf-2* alone, and nearly full penetrance for single-flower primary inflorescences that also exhibit enhanced leaf-like sepals. (C) A whole plant view of *RNAi-slbop tmf-2* plants showing enhanced early flowering and single-flower inflorescences in both primary and side shoots showing leaf-like sepals. Red arrows indicate inflorescences. Leaves were removed to show inflorescences. (D) Quantification and comparison of the penetrance for the single-flower primary inflorescence phenotype in *tmf-2* and *RNAi-slbop tmf-2* plants. L: leaf. Scale bars: 2.5 cm (A, B), 5 cm (C).

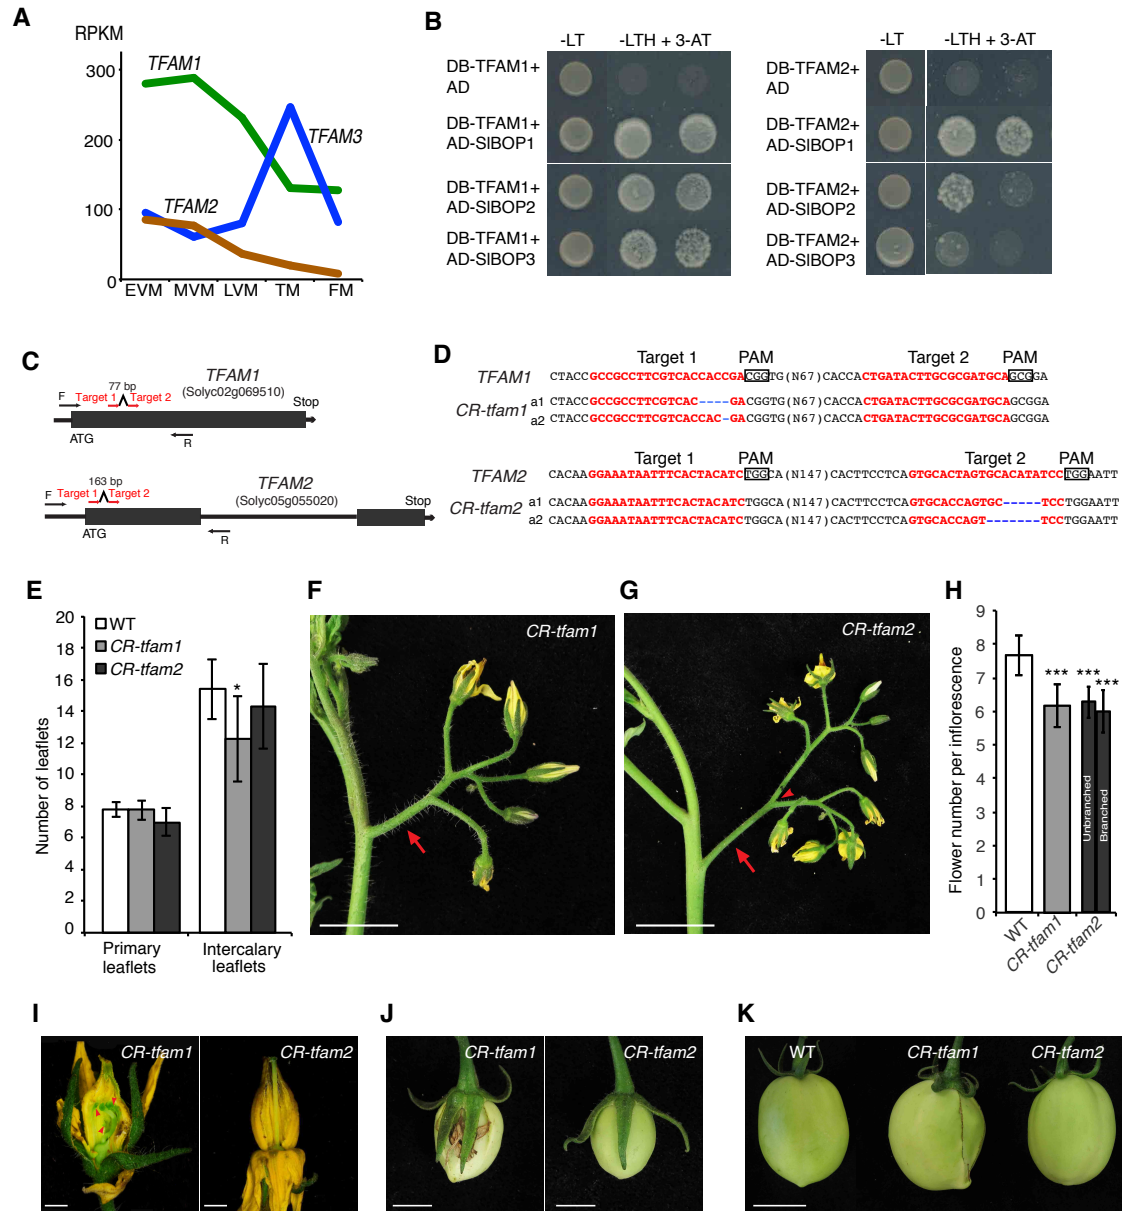

**Supplemental Figure S8.** CRISPR/Cas9-generated null mutations in *TFAM1* and 2 result in phenotypes that match multiple defects of *sibop* single mutants. (A) Normalized RNA-seq read counts for *TFAM1*, 2, and 3 in five stages of primary shoot meristem maturation showing dynamic expression of *TFAM1* and *TFAM2*, similar to *TMF* and *SIBOP1* and 2 (Fig.3). (B) Yeast two-hybrid assays showing *SIBOP1*, 2, and 3 interact

with TFAM1 and TFAM2. (C) Schematics illustrating two sgRNAs (red arrows) targeting *TFAM1* and *TFAM2*. Black arrows represent PCR genotyping primers. (D) Sequences from homozygous T1 transgenic progeny plants lacking the *Cas9* transgene showing out-of-frame deletions (blue dashed lines) for *CR-tfam1* and 2, resulting in two independent null loss-of-function alleles (a1, a2). Red font highlights sgRNA targets, and black boxes indicate PAM sequences. (E) Quantification and statistical comparison of leaflets in WT and *CR-tfam1* and 2 mutants. (F, G) Representative inflorescences (red arrow) from *CR-tfam1* (F) and *CR-tfam2* mutants (G). Red arrowhead in (G) indicates a single branching event often observed in *CR-tfam2* mutants, similar to *CR-slbop2* mutants (Figure 4D). (H) Quantification and statistical comparison of flowers per inflorescence in WT and *CR-tfam1* and 2 mutants. Note that flower number for *CR-tfam2* plants was quantified as the flowers on each inflorescence branch from branched inflorescences, and from unbranched inflorescences separately. (I) Representative flowers from *CR-tfam1* (left), *CR-tfam2* (right) mutants showing ectopic twisted stigmas fused with stamens (arrowheads) in *CR-tfam1*. (J, K) Representative fruits from *CR-tfam1* and 2 showing floral organ abscission defects (J), scars on fruits, and altered fruit shape (K) in *CR-tfam1*, similar to *CR-slbop* single mutants (Supplemental Fig. S3). Scale bars, 2 cm (F, G, K), 500  $\mu$ m (I, J). Data are means ( $\pm$ s.d.);  $n = 5-11$  (E);  $n = 11-21$  (H). A two-tailed, two-sample Student's *t* test was performed, and significant differences represented by black asterisks: \* $P < 0.05$ , \*\*\* $P < 0.001$ .

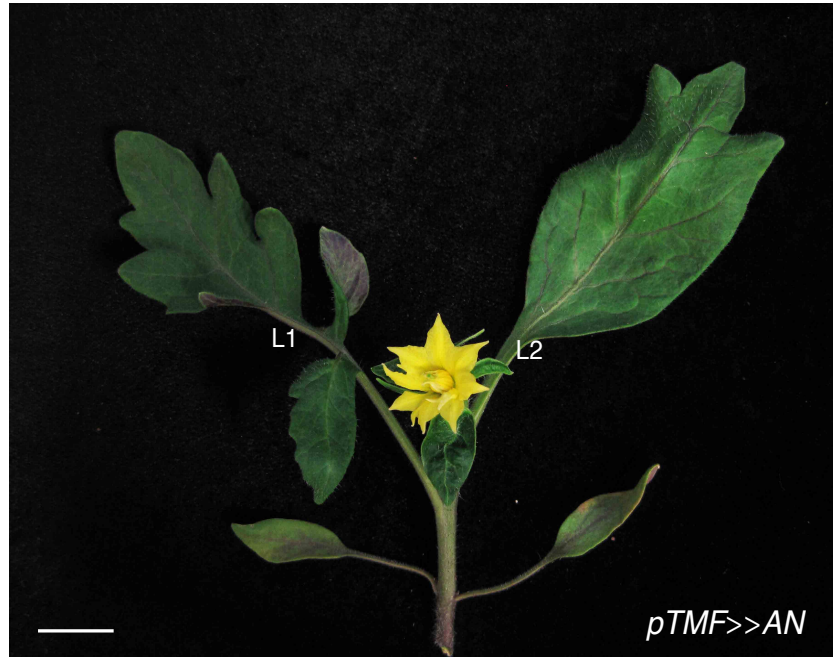

**Supplemental Figure S9.** Driving expression of the flower specification gene *AN* in the earliest stage of meristem maturation using *TMF* promoter (Transactivation, LhG4, OP system) results in single-flower primary inflorescence after producing only two leaves. Scale bars, 2 cm.

| Gene          | Guide RNA sequences     |                         | Genotyping primers        |                           |
|---------------|-------------------------|-------------------------|---------------------------|---------------------------|
|               | Target 1                | Target 2                | Forward                   | Reverse                   |
| <i>SIBOP1</i> | ATTGGGCCGAGCTCTCCTCAGTC | ATTGTGATACCGTGAATTCAGT  | CACAAGACAAAACACCAACCA     | GTCATGTTTTTGCGGTACA       |
| <i>SIBOP2</i> | ATTGGCCCGCGGTTGGGCCCGTT | ATTGTAATACCTGTGAACACTGT | GCCACTAACCTTTCTCCTATTG    | GGCTGATGTGCAATGTGTATG     |
| <i>SIBOP3</i> | ATTGGCCCTGAGTCGCCTGGTGG | ATTGGTAGTAATACCTGTGAACT | CACAAAATCATCTTCCACTATGTGA | TGCAATGTGTATGCCAACAG      |
| <i>TFAM1</i>  | ATTGCCGCCTTCGTCACCACCGA | ATTCTGATACTTGCGCGATGCA  | AAAGTAACACAGCCATGTTAGACG  | GCCGAAAAACGGACAATTAC      |
| <i>TFAM2</i>  | ATTGGAAATAATTCACTACATC  | ATTGTGCACTAGTGCACATATCC | TTTCCTCCCTATTTCAAGAATCA   | TCCTTCAAAAATTACCACCTTATCC |

**Supplemental Table S1.** Single guide RNA (sgRNA) sequences and genotyping primers of *CR-slbops* and *CR-tfams*.

| Primer name | Primer Sequence 5' to 3' |
|-------------|--------------------------|
| SIBOP1-F    | TGGCATCACTCCATTGGACA     |
| SIBOP1-R    | GATCAATGTTTTCGCTCCCT     |
| SIBOP2-F    | GGGTGAAGCGAATAACAATCAA   |
| SIBOP2-R    | TGCATGCCATTTGATGATGATG   |
| SIBOP3-F    | TCTTCCACCGGATATTCCA      |
| SIBOP3-R    | TTCGTCAATCTGTTCACCC      |
| FA-F        | CACTGCCTTGATGAGGATGC     |
| FA-R        | TCAGAATGGCACAGCTGTTCG    |
| AN-F        | GAGCCTTGTTGAAGGGAATG     |
| AN-R        | CCTTGTCATTCTCCACTTC      |
| SISEP3-F    | CGGCAAACAACCTCAAACCTCA   |
| SISEP3-R    | TGATAGGAAAACCATTGAGCA    |
| FUL-F       | AGAAAGCGCTCCAAGAACAA     |
| FUL-R       | CCGATCCATCTCTGTTCATTCC   |
| S-F         | TTCAACTGTTTCTCCTCTTGCT   |
| S-R         | CCTATCCAACCTCAAAGC       |

**Supplemental Table S2.** qRT-PCR primers used in this study.
